# Supplementary material for: Attempting to Increase the Effectiveness of the Antidepressant Trazodone Hydrochloride Drug Using π-Acceptors
Source: MDPI journal article supplement (doi:10.3390/ijerph191811281), 2022-09-08
Supplement: s1 [file s1]

**Table S1.** [(TZD)(DCQ)]-serotonin interactions results by DS.

| Name                              | Distance | Category      | Type                       |
|-----------------------------------|----------|---------------|----------------------------|
| ASN343:HD21 - [(TZD)(DCQ):O       | 2.88554  | Hydrogen Bond | Conventional Hydrogen Bond |
| [(TZD)(DCQ):C - ASP155:OD2        | 3.31333  | Hydrogen Bond | Carbon Hydrogen Bond       |
| [(TZD)(DCQ):CL - SER159:O         | 3.69785  | Hydrogen Bond | Carbon Hydrogen Bond       |
| [(TZD)(DCQ):CL - SER242:O         | 3.25597  | Hydrogen Bond | Carbon Hydrogen Bond       |
| [(TZD)(DCQ):HN - TRP336           | 3.13951  | Hydrogen Bond | Pi-Donor Hydrogen Bond     |
| TRP336 - [(TZD)(DCQ]              | 4.87891  | Hydrophobic   | Pi-Pi T-shaped             |
| PHE340 - [(TZD)(DCQ]              | 4.72846  | Hydrophobic   | Pi-Pi T-shaped Pi-         |
| [(TZD)(DCQ] - PHE339              | 4.76266  | Hydrophobic   | Pi T-shaped                |
| SER159:C,O;THR160:N - [(TZD)(DCQ] | 5.28218  | Hydrophobic   | Amide-Pi Stacked           |
| LEU229 - [(TZD)(DCQ]              | 5.08258  | Hydrophobic   | Alkyl                      |
| VAL235 - [(TZD)(DCQ]              | 4.95457  | Hydrophobic   | Alkyl                      |
| VAL366 - [(TZD)(DCQ]              | 5.15107  | Hydrophobic   | Alkyl                      |
| [(TZD)(DCQ):CL - ILE135           | 4.65913  | Hydrophobic   | Alkyl                      |
| [(TZD)(DCQ):CL - VAL156           | 3.80768  | Hydrophobic   | Alkyl                      |
| TYR139 - [(TZD)(DCQ):CL           | 4.7308   | Hydrophobic   | Pi-Alkyl                   |
| TRP151 - [(TZD)(DCQ]              | 4.57405  | Hydrophobic   | Pi-Alkyl                   |
| TRP336 - [(TZD)(DCQ):CL           | 3.79169  | Hydrophobic   | Pi-Alkyl                   |
| PHE339 - [(TZD)(DCQ):CL           | 4.38122  | Hydrophobic   | Pi-Alkyl                   |
| PHE340 - [(TZD)(DCQ]              | 5.19771  | Hydrophobic   | Pi-Alkyl                   |
| [(TZD)(DCQ] - VAL156              | 5.49878  | Hydrophobic   | Pi-Alkyl                   |
| [(TZD)(DCQ] - LEU229              | 4.7862   | Hydrophobic   | Pi-Alkyl                   |
| [(TZD)(DCQ] - VAL366              | 4.23249  | Hydrophobic   | Pi-Alkyl                   |

**Table S2.** TZD-serotonin interactions results by DS.

| Name                     | Distance | Category    | Type           |
|--------------------------|----------|-------------|----------------|
| TRP151:CH2 - [(TZD)(DCQ] | 3.91922  | Hydrophobic | Pi-Sigma       |
| TRP151 - [(TZD)(DCQ]     | 5.26375  | Hydrophobic | Pi-Pi T-shaped |
| [(TZD)(DCQ] - TRP336     | 4.8628   | Hydrophobic | Pi-Pi T-shaped |
| [(TZD)(DCQ] - PHE340     | 4.6715   | Hydrophobic | Pi-Pi T-shaped |
| VAL366 -[(TZD)(DCQ]      | 5.09644  | Hydrophobic | Alkyl          |
| [(TZD)(DCQ):Cl - VAL366  | 4.04828  | Hydrophobic | Alkyl          |
| TRP151 - [(TZD)(DCQ]     | 5.26133  | Hydrophobic | Pi-Alkyl       |
| TRP336 - [(TZD)(DCQ]     | 4.77987  | Hydrophobic | Pi-Alkyl       |
| TRP336 - [(TZD)(DCQ]     | 4.78786  | Hydrophobic | Pi-Alkyl       |
| PHE340 - [(TZD)(DCQ]     | 4.80985  | Hydrophobic | Pi-Alkyl       |
| TRP367 - [(TZD)(DCQ):Cl  | 4.70609  | Hydrophobic | Pi-Alkyl       |
| [(TZD)(DCQ] - VAL366     | 4.79115  | Hydrophobic | Pi-Alkyl       |
| [(TZD)(DCQ] - VAL156     | 5.41572  | Hydrophobic | Pi-Alkyl       |

**Table S3.** The bond lengths of [(TZD)(DCQ)] obtained through DFT.

| S. No. | [(TZD)(DCQ)] (RB3LYP/ 6-311G++) |                 |          |                 |
|--------|---------------------------------|-----------------|----------|-----------------|
|        | Atom No.                        | Bond length (Å) | Atom No. | Bond length (Å) |
| 1      | R(1-20)                         | 1.761           | R(15-16) | 1.353           |
| 2      | R(2-18)                         | 1.259           | R(15-17) | 1.54            |
| 3      | R(3-8)                          | 1.47            | R(16-20) | 1.537           |
| 4      | R(3-9)                          | 1.477           | R(16-41) | 1.071           |
| 5      | R(3-12)                         | 1.468           | R(17-21) | 1.357           |
| 6      | R(4-10)                         | 1.469           | R(17-42) | 1.071           |
| 7      | R(4-11)                         | 1.469           | R(19-24) | 1.524           |
| 8      | R(4-15)                         | 1.466           | R(20-22) | 1.354           |
| 9      | R(5-7)                          | 1.411           | R(21-22) | 1.542           |
| 10     | R(5-14)                         | 1.476           | R(21-43) | 1.069           |
| 11     | R(5-18)                         | 1.473           | R(22-44) | 1.071           |
| 12     | R(6-18)                         | 1.455           | R(23-25) | 1.374           |
| 13     | R(6-19)                         | 1.455           | R(23-45) | 1.07            |
| 14     | R(6-23)                         | 1.475           | R(24-26) | 1.352           |
| 15     | R(7-19)                         | 1.297           | R(24-46) | 1.07            |
| 16     | R(8-10)                         | 1.539           | R(25-26) | 1.554           |
| 17     | R(8-27)                         | 1.07            | R(25-47) | 1.068           |
| 18     | R(8-28)                         | 1.069           | R(26-48) | 1.073           |
| 19     | R(9-11)                         | 1.54            | R(49-50) | 1.543           |
| 20     | R(9-29)                         | 1.069           | R(49-54) | 1.537           |
| 21     | R(9-30)                         | 1.071           | R(49-56) | 1.256           |
| 22     | R(10-31)                        | 1.07            | R(50-51) | 1.355           |
| 23     | R(10-32)                        | 1.067           | R(50-57) | 1.759           |
| 24     | R(11-33)                        | 1.071           | R(51-52) | 1.539           |
| 25     | R(11-34)                        | 1.07            | R(51-55) | 1.071           |
| 26     | R(12-13)                        | 1.537           | R(52-53) | 1.542           |
| 27     | R(12-35)                        | 1.071           | R(52-60) | 1.292           |
| 28     | R(12-36)                        | 1.072           | R(53-54) | 1.354           |
| 29     | R(13-14)                        | 1.54            | R(53-59) | 1.071           |
| 30     | R(13-37)                        | 1.072           | R(54-58) | 1.762           |
| 31     | R(13-38)                        | 1.069           | R(60-61) | 1.69            |
| 32     | R(14-39)                        | 1.069           | R(7-56)  | 2.038           |
| 33     | R(14-40)                        | 1.069           |          |                 |

**Table S4.** The bond angles of the [(TZD)(DCQ)] obtained through DFT.

| S. No. | [(TZD)(DCQ)] (RB3LYP/ 6-311G++) |                |             |                |
|--------|---------------------------------|----------------|-------------|----------------|
|        | Atom No.                        | Bond Angle (Å) | Atom No.    | Bond Angle (Å) |
| 1      | A(1-20-16)                      | 119.8          | A(13-12-35) | 109.1          |
| 2      | A(1-20-22)                      | 120.3          | A(13-12-36) | 108.9          |
| 3      | A(2-18-5)                       | 125.4          | A(12-13-14) | 110.2          |
| 4      | A(2-18-6)                       | 125.8          | A(12-13-37) | 109.5          |

|    |            |       |             |       |
|----|------------|-------|-------------|-------|
| 5  | A(8-3-9)   | 110.2 | A(12-13-38) | 109   |
| 6  | A(8-3-12)  | 108.6 | A(35-12-36) | 109.7 |
| 7  | A(3-8-10)  | 109.8 | A(14-13-37) | 110.4 |
| 8  | A(3-8-27)  | 109.5 | A(14-13-38) | 108.1 |
| 9  | A(3-8-28)  | 109.4 | A(13-14-39) | 110.9 |
| 10 | A(9-3-12)  | 108.4 | A(13-14-40) | 109.2 |
| 11 | A(3-9-11)  | 110.2 | A(37-13-38) | 109.5 |
| 12 | A(3-9-29)  | 109.5 | A(39-14-40) | 109.3 |
| 13 | A(3-9-30)  | 109.1 | A(16-15-17) | 120   |
| 14 | A(3-12-13) | 110.7 | A(15-16-20) | 120.2 |
| 15 | A(3-12-35) | 108.4 | A(15-16-41) | 119.8 |
| 16 | A(3-12-36) | 110.1 | A(15-17-21) | 119.9 |
| 17 | A(10-4-11) | 108.9 | A(15-17-42) | 120.1 |
| 18 | A(10-4-15) | 109.7 | A(20-16-41) | 120   |
| 19 | A(4-10-8)  | 109.1 | A(16-20-22) | 119.9 |
| 20 | A(4-10-31) | 109.6 | A(21-17-42) | 120   |
| 21 | A(4-10-32) | 109.4 | A(17-21-22) | 119.9 |
| 22 | A(11-4-15) | 110.3 | A(17-21-43) | 120.1 |
| 23 | A(4-11-9)  | 109.1 | A(19-24-26) | 117.3 |
| 24 | A(4-11-33) | 109.7 | A(19-24-46) | 121.4 |
| 25 | A(4-11-34) | 109.5 | A(20-22-21) | 120.1 |
| 26 | A(4-15-16) | 118.9 | A(20-22-44) | 120   |
| 27 | A(4-15-17) | 121.1 | A(22-21-43) | 120   |
| 28 | A(7-5-14)  | 113   | A(21-22-44) | 120   |
| 29 | A(7-5-18)  | 102.4 | A(25-23-45) | 120.1 |
| 30 | A(5-7-19)  | 111.7 | A(23-25-26) | 121   |
| 31 | A(5-7-56)  | 123.9 | A(23-25-47) | 119.6 |
| 32 | A(14-5-18) | 105.6 | A(26-24-46) | 121.3 |
| 33 | A(5-14-13) | 106.9 | A(24-26-25) | 119   |
| 34 | A(5-14-39) | 110.6 | A(24-26-48) | 120.1 |
| 35 | A(5-14-40) | 109.9 | A(26-25-47) | 119.5 |
| 36 | A(5-18-6)  | 108.8 | A(25-26-48) | 120.9 |
| 37 | A(18-6-19) | 99.4  | A(50-49-54) | 120.1 |
| 38 | A(18-6-23) | 116.7 | A(50-49-56) | 119.9 |
| 39 | A(19-6-23) | 112.7 | A(49-50-51) | 120.1 |
| 40 | A(6-19-7)  | 111.8 | A(49-50-57) | 119.9 |
| 41 | A(6-19-24) | 121.7 | A(54-49-56) | 120   |
| 42 | A(6-23-25) | 120.2 | A(49-54-53) | 119.9 |
| 43 | A(6-23-45) | 119.8 | A(49-54-58) | 119.8 |
| 44 | A(7-19-24) | 126.5 | A(49-56-7)  | 119.6 |
| 45 | A(19-7-56) | 124.4 | A(51-50-57) | 120   |
| 46 | A(10-8-27) | 109.1 | A(50-51-52) | 119.6 |
| 47 | A(10-8-28) | 109.5 | A(50-51-55) | 120.4 |
| 48 | A(8-10-31) | 110   | A(52-51-55) | 120   |
| 49 | A(8-10-32) | 109.3 | A(51-52-53) | 120.4 |
| 50 | A(27-8-28) | 109.5 | A(51-52-60) | 119.4 |

|           |             |       |             |       |
|-----------|-------------|-------|-------------|-------|
| <b>51</b> | A(11-9-29)  | 109.5 | A(53-52-60) | 120.2 |
| <b>52</b> | A(11-9-30)  | 108.9 | A(52-53-54) | 119.9 |
| <b>53</b> | A(9-11-33)  | 109.2 | A(52-53-59) | 120.2 |
| <b>54</b> | A(9-11-34)  | 109.9 | A(52-60-61) | 119.9 |
| <b>55</b> | A(29-9-30)  | 109.5 | A(54-53-59) | 119.9 |
| <b>56</b> | A(31-10-32) | 109.5 | A(53-54-58) | 120.2 |
| <b>57</b> | A(33-11-34) | 109.4 |             |       |

**Table S5.** Mulliken atomic charges of the [(TZD)(DCQ)] atoms.

| S. No.    | Synthesized complex |                 |                 |                 |
|-----------|---------------------|-----------------|-----------------|-----------------|
|           | Mulliken atomic     | Mulliken atomic | Mulliken atomic | Mulliken atomic |
|           | numbers             | charges         | numbers         | charges         |
| <b>1</b>  | 1Cl                 | -0.04942        | 32H             | 0.16865         |
| <b>2</b>  | 2O                  | -0.54516        | 33H             | 0.17958         |
| <b>3</b>  | 3N                  | -0.54281        | 34H             | 0.16717         |
| <b>4</b>  | 4N                  | -0.66525        | 35H             | 0.13573         |
| <b>5</b>  | 5N                  | -0.46077        | 36H             | 0.31159         |
| <b>6</b>  | 6N                  | -0.6965         | 37H             | 0.17188         |
| <b>7</b>  | 7N                  | -0.3286         | 38H             | 0.22389         |
| <b>8</b>  | 8C                  | -0.13684        | 39H             | 0.22325         |
| <b>9</b>  | 9C                  | -0.13969        | 40H             | 0.21835         |
| <b>10</b> | 10C                 | -0.20156        | 41H             | 0.19948         |
| <b>11</b> | 11C                 | -0.16839        | 42H             | 0.19277         |
| <b>12</b> | 12C                 | -0.13341        | 43H             | 0.17103         |
| <b>13</b> | 13C                 | -0.50297        | 44H             | 0.19276         |
| <b>14</b> | 14C                 | -0.09915        | 45H             | 0.2377          |
| <b>15</b> | 15C                 | 0.25538         | 46H             | 0.21345         |
| <b>16</b> | 16C                 | -0.08244        | 47H             | 0.19118         |
| <b>17</b> | 17C                 | -0.13231        | 48H             | 0.1895          |
| <b>18</b> | 18C                 | 0.78762         | 49C             | 0.59717         |
| <b>19</b> | 19C                 | 0.40068         | 50C             | -0.30143        |
| <b>20</b> | 20C                 | -0.26758        | 51C             | -0.0586         |
| <b>21</b> | 21C                 | -0.1559         | 52C             | 0.2488          |
| <b>22</b> | 22C                 | -0.0655         | 53C             | 0.0574          |
| <b>23</b> | 23C                 | 0.09151         | 54C             | -0.35593        |
| <b>24</b> | 24C                 | -0.15677        | 55H             | 0.27504         |
| <b>25</b> | 25C                 | -0.21765        | 56O             | -0.40821        |
| <b>26</b> | 26C                 | -0.11492        | 57Cl            | 0.1072          |
| <b>27</b> | 27H                 | 0.1532          | 58Cl            | 0.04778         |
| <b>28</b> | 28H                 | 0.19075         | 59H             | 0.24535         |
| <b>29</b> | 29H                 | 0.17018         | 60N             | -0.56297        |
| <b>30</b> | 30H                 | 0.16677         | 61Cl            | 0.1523          |
| <b>31</b> | 31H                 | 0.21561         |                 |                 |

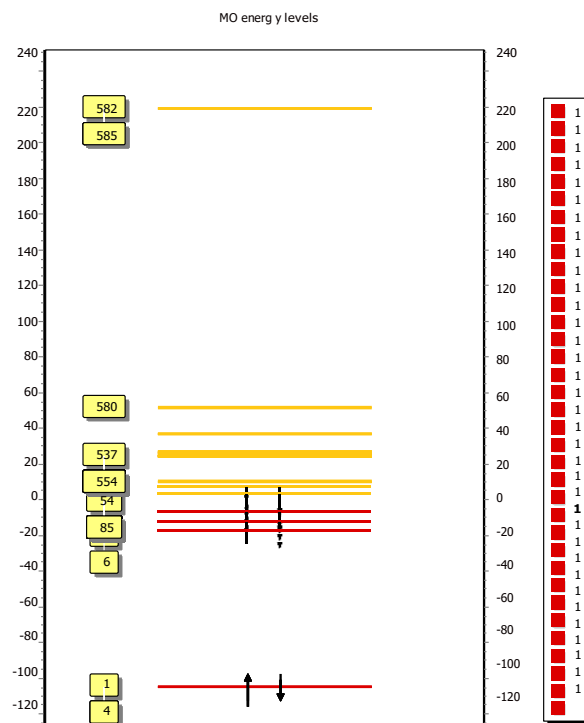

**Figure S1.** MO energy level diagram of the [(TZD)(DCQ)] complex.
